# Supplementary material
Source: publisher figshare collection journal article supplement (https://acs.figshare.com/ndownloader/files/8213867)
Supplement: Supplementary file 1 [file 8213867]

## Supporting Information

# Crosslinking Induced Self-organization of Polymers into Degradable Assemblies

*Conghui Yuan †‡\*, Bihong Hong †‡, Ying Chang †‡, Jie Mao †‡, Yang Li †‡, Yiting  
Xu †‡, Birong Zeng †‡, Weiang Luo †‡, Jean-François Gérard §, Lizong Dai †‡\**

† College of Materials, Xiamen University, Xiamen, 361005, China

‡ Fujian Provincial Key Laboratory of Fire Retardant Materials, College of Materials,  
Xiamen University, Xiamen, 361005, China

§ INSA de Lyon, IMP, Villeurbanne F-69621, France

Corresponding author E-mail address:

\*Conghui Yuan, E-mail: [yuanch@xmu.edu.cn](mailto:yuanch@xmu.edu.cn); \*Lizong Dai, E-mail:  
[lzdai@xmu.edu.cn](mailto:lzdai@xmu.edu.cn)

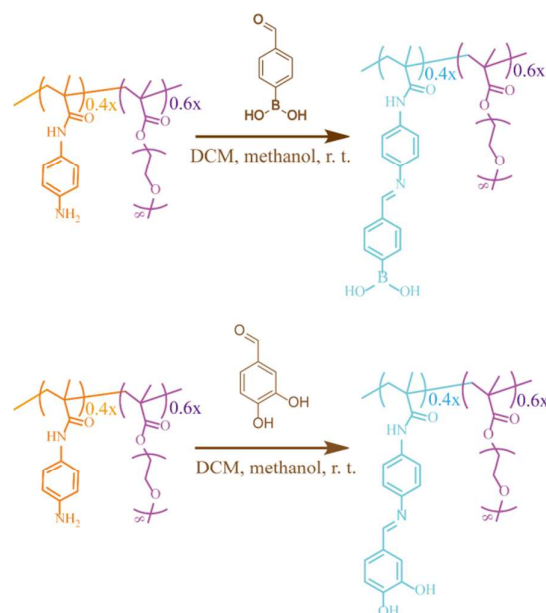

Scheme S1. Synthetic procedures of BP and CP.

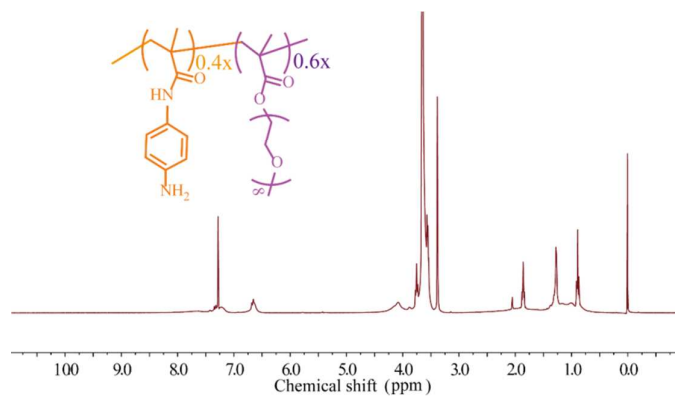

Figure S1.  $^1\text{H}$  NMR spectrum of P(APMA-co-MAPEG) in  $\text{CDCl}_3$ .

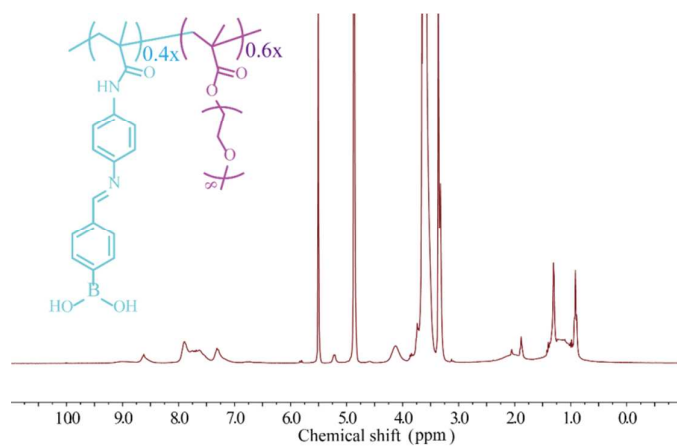

Figure S2.  $^1\text{H}$  NMR spectrum of BP in methanol- $\text{D}_4$ .

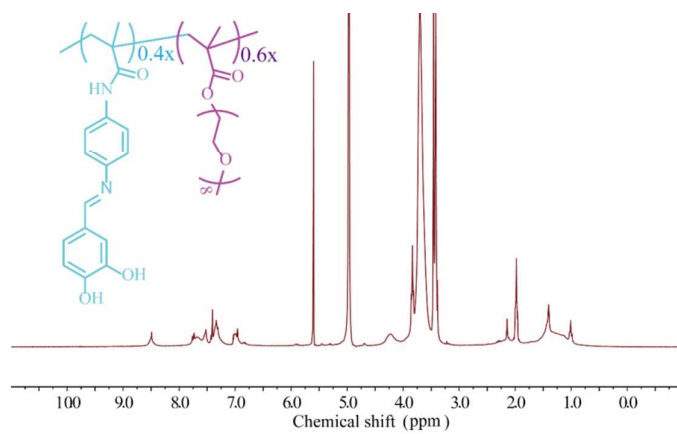

Figure S3.  $^1\text{H}$  NMR spectrum of CP in methanol- $\text{D}_4$ .

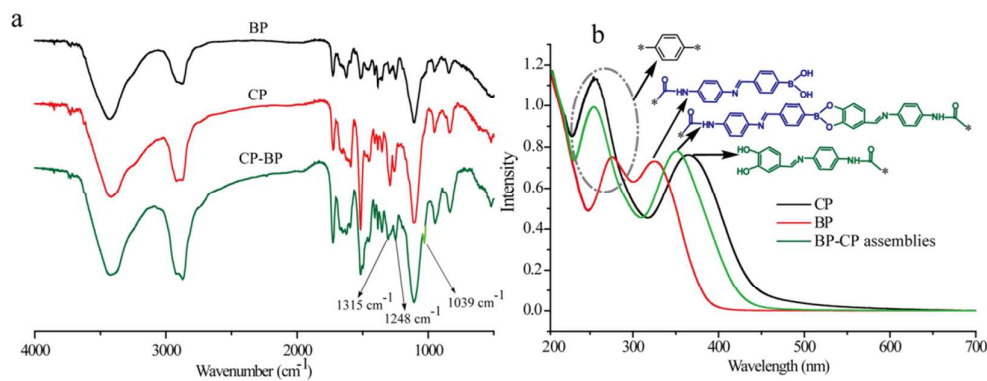

Figure S4. FT-IR (a) and UV-vis spectra (b) of BP, CP and BP-CP assemblies. The absorption peaks were tentatively assigned to the corresponding groups as shown in (b).

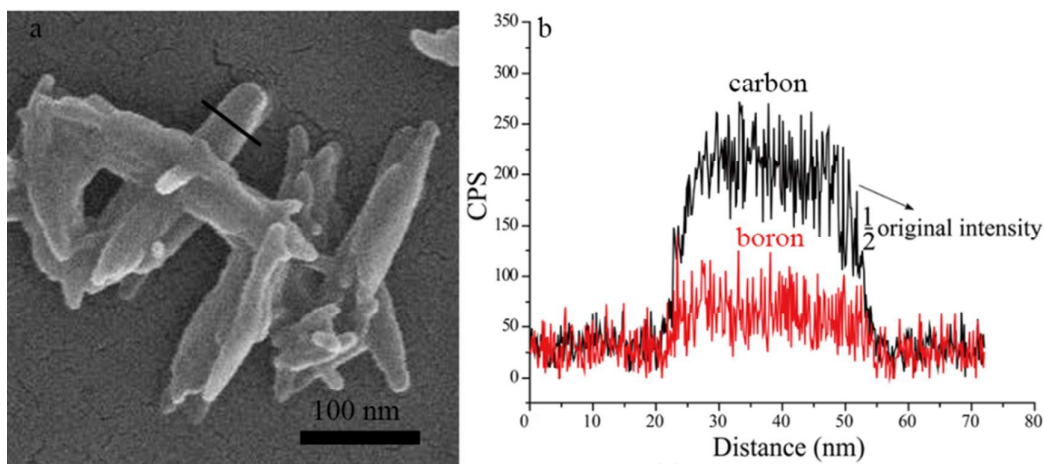

Figure S5. SEM image of bundle-like assemblies redispersed in water solution (a) and the corresponding EDX line scan analyses (b).

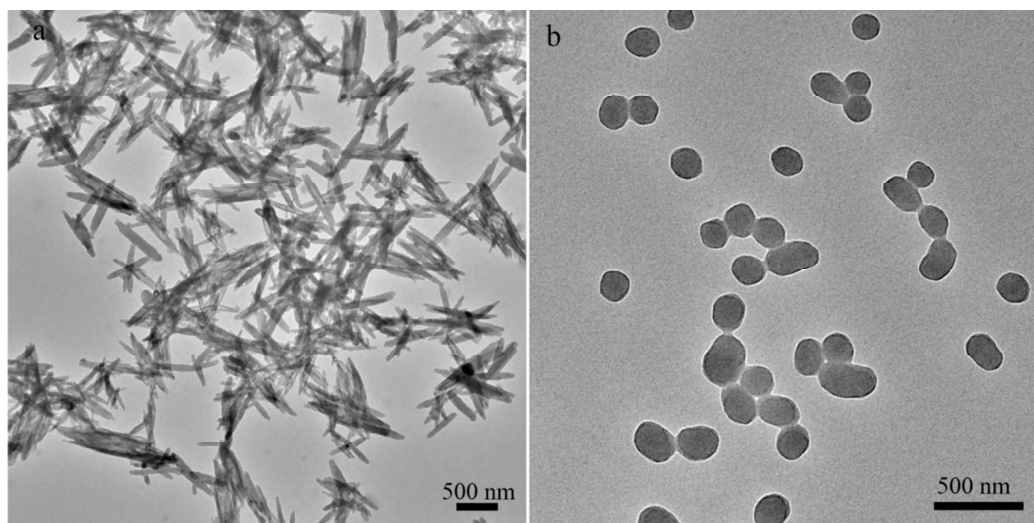

Figure S6. TEM images of bundle-like assemblies (a) formed in dichloromethane with a concentration of BP+CP 2.0 mg/mL, and spherical assemblies (b) formed in a mixed solvent (the volume ratio of methanol to water is 1:1) with 2.0 mg/mL BP+CP.

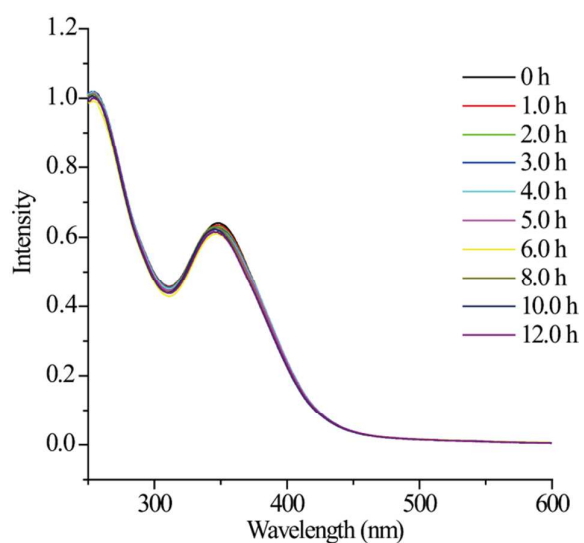

Figure S7. UV-vis spectrum evolution of bundle-like assemblies at pH=7.4 without D-glucose. Bundle-like assemblies were prepared by using 0.2 mg/mL of BP and CP.

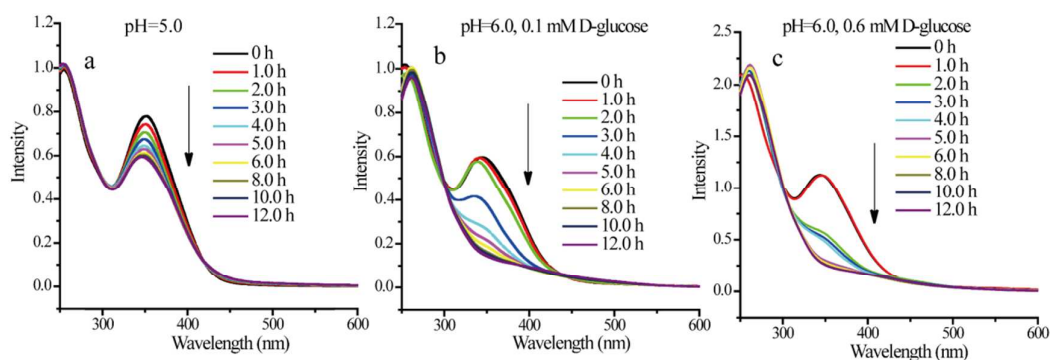

Figure S8. UV-vis spectrum evolution of bundle-like assemblies under different stimuli: (a) pH=5.0, (b) pH=6.0 with 0.1 mM of D-glucose, (c) pH=6.0 with 0.6 mM of D-glucose. Bundle-like assemblies were prepared by using 0.2 mg/mL of BP and CP.

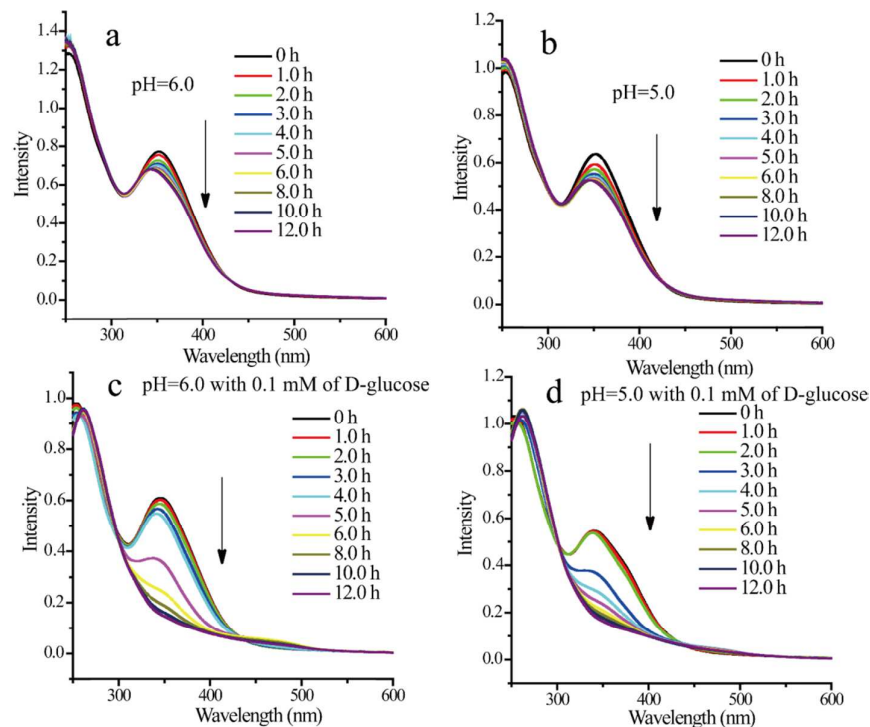

Figure S9. UV-vis spectrum evolution of spherical assemblies under different stimuli: (a) pH=6.0, (b) pH=5.0, (c) pH=6.0 with 0.1 mM of D-glucose and (d) pH=5.0 with 0.6 mM of D-glucose. Spherical assemblies were prepared by using 0.2 mg/mL of BP and CP.

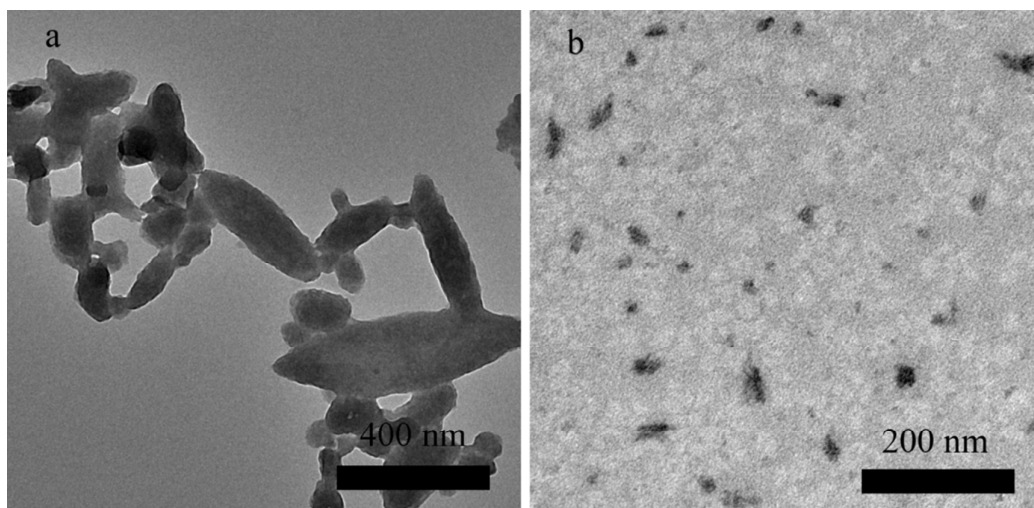

Figure S10. TEM images of bundle-like assemblies after staying in a solution with 0.1 mM of D-glucose at pH=5.0 for 2.0 h (a) and 8.0 h (b). Bundle-like assemblies were prepared by using 0.2 mg/mL of BP and CP.

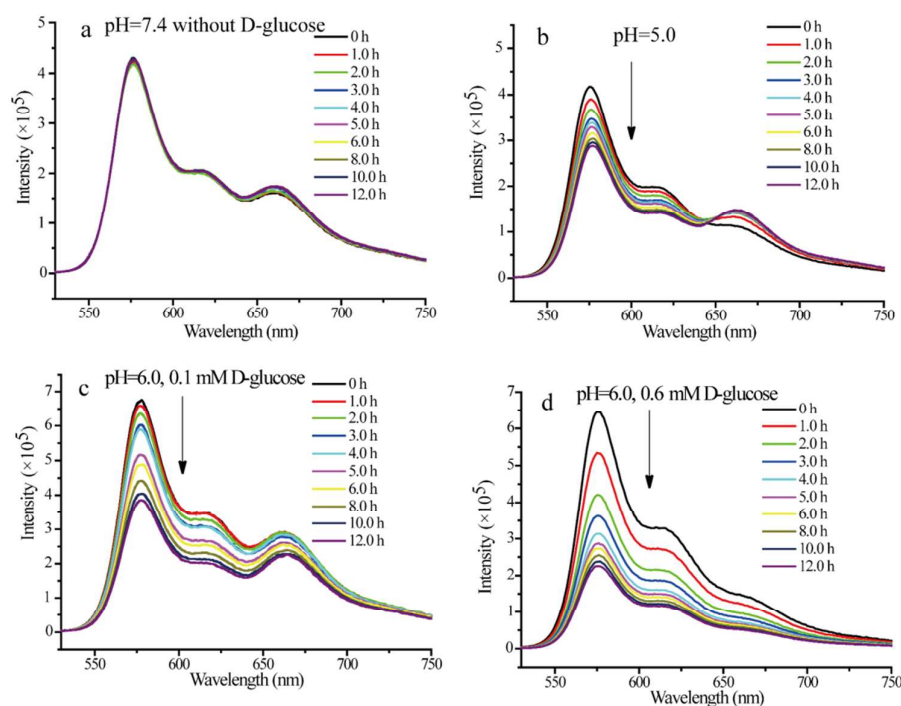

Figure S11. Fluorescence spectrum evolution of DiI encapsulated in bundle-like assemblies in a solution at pH=7.4 without D-glucose (a). Fluorescence spectra trace the release of DiI from bundle-like assemblies in response to different stimuli: (b) pH=5.0, (c) pH=6.0 with 0.1 mM of D-glucose, (d) pH=6.0 with 0.6 mM of D-glucose. Bundle-like assemblies were prepared by using 0.2 mg/mL of BP and CP.



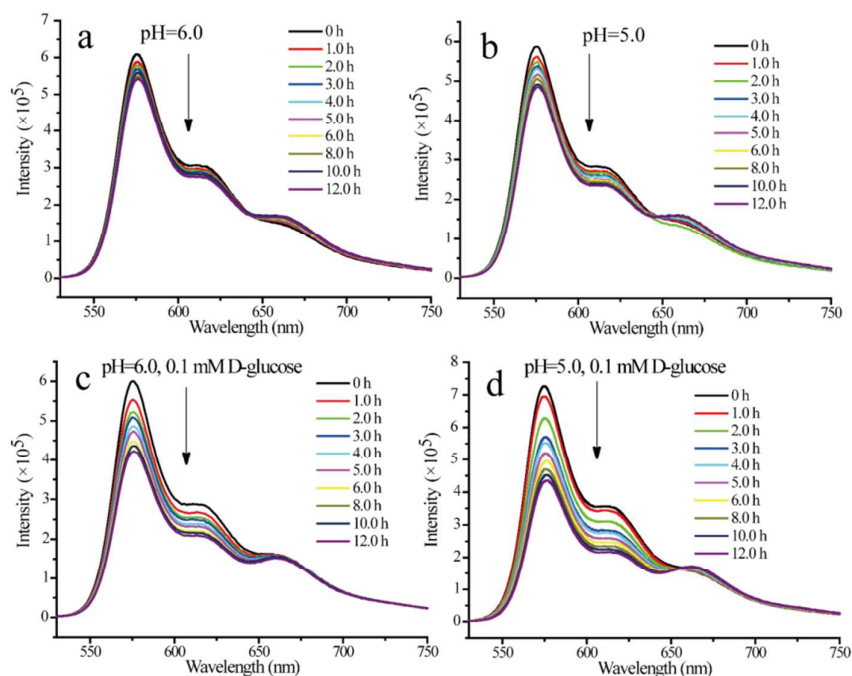

Figure S12. Fluorescence spectra trace the release of DiI from spherical assemblies in response to different stimuli: (a) pH=6.0, (b) pH=5.0, (c) pH=6.0 with 0.1 mM of D-glucose, (d) pH=5.0 with 0.1 mM of D-glucose. Spherical assemblies were prepared by using 0.2 mg/mL of BP and CP.

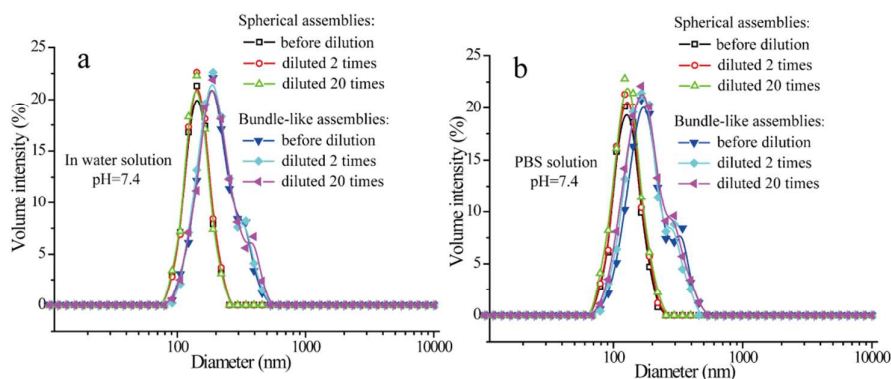

Figure S13. Stability of spherical and bundle-like assemblies against dilution: (a) in water solution with pH=7.4, (b) in PBS solution with pH=7.4. Both spherical and bundle assemblies were prepared by using 0.2 mg/mL BP+CP. Therefore, in this measurement, samples before dilution, diluted 2 times and diluted 20 times represented assembly concentration of 0.2, 0.1 and 0.01 mg/mL, respectively. The DLS tests were conducted 24 h after dilution.



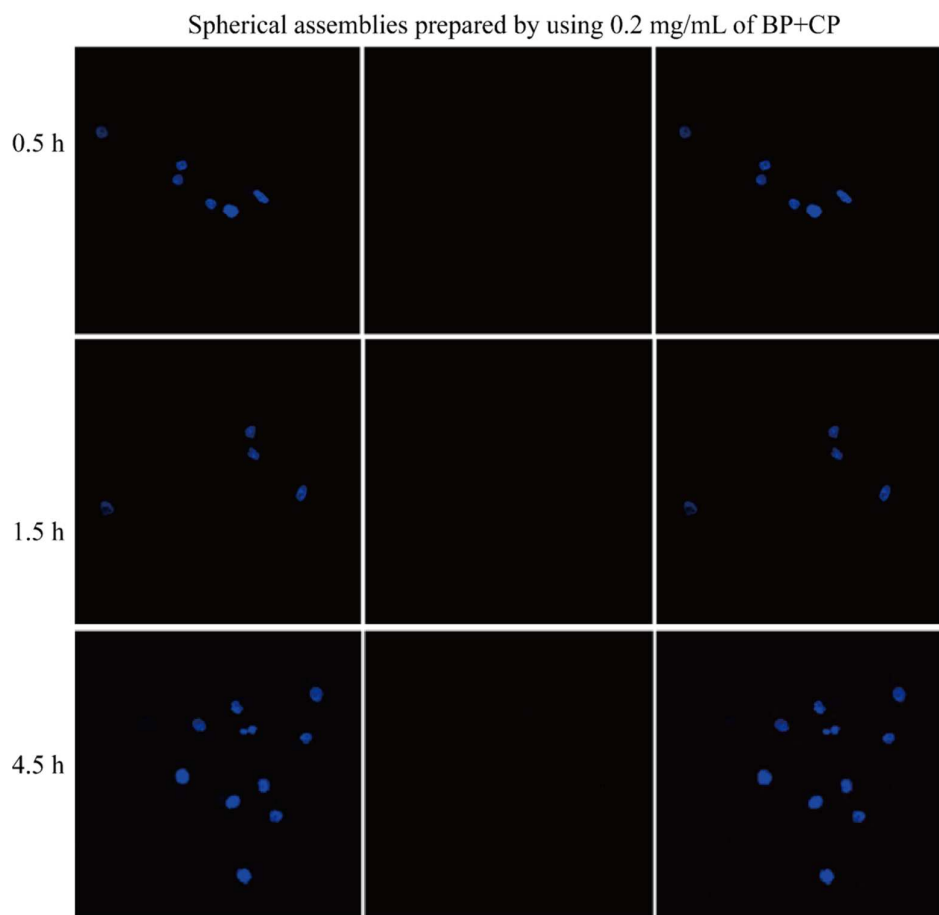

Figure S14. CLSM images of HeLa cells incubated with spherical assemblies prepared by using 0.2 mg/mL of BP and CP. For each panel, the images from left to right show cell nuclei stained with 2-(4-amidinophenyl)-6-indolecarbamide dihydrochloride (DAPI, blue), DiI loaded BP-CP assemblies (red) in cells, and overlays of the two images.
